# Supplementary material
Source: Springer Nature journal article supplement (https://www.springermedizin.de/resource/supplementary/12884_2007_21_MOESM2_ESM.pdf/9459760)
Supplement: MOESM2 [file 9459760]

## **Alternative domestic services while mother is away**

- *Stocking food and firewood*
- *Finding other person to take care of home and children*

## **Gathering personal effects for mother-to-be and newborn**

- *Vaseline and soap*
- *A jerrycan for water and a basin for bathing*
- *Mother and Baby clothes and powder*

## **Buying materials for use by health care providers**

- *Gloves and razorblade (for cutting the cord)*
- *Threads (to be used as cord ligatures)*
- *Syringes, needles and injectable ergometrine (to stop postpartum hemorrhage)*
- *Cotton wool*
- *'Kavera' (an improvised mackintosh made from a plastic bag)*
- *Selection of a provider for delivery*

## **Preparation for emergencies**

*Asking transport money from male partners or saving from own sources for emergencies, especially referral for caesarian section or blood transfusion*
